# Supplementary material for: Tertiary amine mediated aerobic oxidation of sulfides into sulfoxides by visible-light photoredox catalysis on TiO2
Source: PubMed Central journal article supplement (PMC5664354; doi:10.1039/c5sc01813g), 2015-06-09
Supplement: SC-006-C5SC01813G-s001.pdf [file SC-006-C5SC01813G-s001.pdf]

## Electronic Supplementary Information

### Table of contents

|                                                                                                                                                                                                                                                                             |        |
|-----------------------------------------------------------------------------------------------------------------------------------------------------------------------------------------------------------------------------------------------------------------------------|--------|
| <b>Reagents and solvents:</b> .....                                                                                                                                                                                                                                         | S2     |
| <b>General procedure for the oxidation of sulfide:</b> .....                                                                                                                                                                                                                | S2     |
| <b>Instrumentation and conditions:</b> .....                                                                                                                                                                                                                                | S2     |
| <b>Light source:</b> .....                                                                                                                                                                                                                                                  | S2     |
| <b>UV-Vis:</b> .....                                                                                                                                                                                                                                                        | S3     |
| <b>XPS:</b> .....                                                                                                                                                                                                                                                           | S3     |
| <b>GC and GC-MS:</b> .....                                                                                                                                                                                                                                                  | S3     |
| <b>DFT calculation:</b> .....                                                                                                                                                                                                                                               | S4     |
| <br>                                                                                                                                                                                                                                                                        |        |
| <b>Figure S1:</b> XPS spectroscopy of Degussa P25 TiO <sub>2</sub> without adsorption of TEA (black line) and after adsorption of TEA (red line).....                                                                                                                       | S3     |
| <b>Figure S2:</b> The side view and top view of the fixed-double-layer (FDL) model of (2×1) rutile (110) and (2×2) anatase (101) surfaces. The bottom two layers (inside the dotted rectangle zone) were fixed to their bulk positions during geometric optimizations. .... | S5     |
| <b>Figure S3:</b> The most stable structures with TMA on the surface. The numbers are the distances from N atoms to its nearest Ti atoms.....                                                                                                                               | S5     |
| <b>Figure S4:</b> DOS of TMA on rutile TiO <sub>2</sub> (110) by PBE.....                                                                                                                                                                                                   | S6     |
| <b>Figure S5:</b> GC-FID results for Table 4 .....                                                                                                                                                                                                                          | S7-S13 |

### **Reagents and solvents:**

All of the reagents used were obtained from commercial suppliers such as Sigma-Aldrich, Alfa Aesar and TCI, etc. The solvents were supplied by Merck or Fischer Scientific. All the reagents and solvents are of the highest purity and used without further purification.

### **General procedure for the oxidation of sulfide:**

In a typical reaction, 40 mg of Degussa P25 TiO<sub>2</sub>, 0.3 mmol of thioanisole and 0.01 mmol of triethylamine were added to 5 mL of CH<sub>3</sub>OH in a Pyrex vessel. After the reaction mixture was stirred for 30 min in dark to reach adsorption equilibrium, O<sub>2</sub> was purged into the Pyrex vessel to raise the initial pressure to 0.1 MPa. The reaction mixture was magnetically stirred at 800 r/min and illuminated with  $\lambda > 400$  nm visible light irradiation in an air-conditioned room to warrant the reaction temperature constantly at 25 °C. At the end of reaction, the TiO<sub>2</sub> photocatalyst particles were separated from the reaction mixture by filtration and the products were quantitatively analyzed by gas chromatography (GC) equipped with a flame ionization detector (FID) using chlorobenzene as the internal standard. The structure of products were confirmed by comparison with the retention time with standard samples and further confirmed by gas chromatography–mass spectrometry (GC-MS).

### **Instrumentation and conditions:**

#### **Light source:**

The reaction was irradiation with an Asahi Spectra MAX-303 300 W Xenon light source using a UV-VIS mirror model. In this mirror model, the irradiating wavelength range is 270 nm-650 nm, thus the possible heating of the reaction medium the infrared light is completely excluded. Additional Asahi Spectra longpass cutoff filters (>400 nm) are used to control irradiation wavelength range during the reaction. The reaction medium was maintained at room temperature throughout the experimental process.

### UV-Vis:

The UV-visible absorption spectra of the solid samples were recorded on a Shimadzu UV 2550 UV-visible Spectrophotometer with a diffuse reflectance measurement accessory.

### XPS:

X-ray Photoelectron Spectroscopy (XPS) were measured by an ESCALAB250XI. The incident radiation was Mg K $\alpha$  X-ray (1253.6 eV) at 400 W and a charge neutralizer was turned on for acquisition. The binding energy of N1s was corrected by C 1s peak (284.8 eV) from residual carbon.

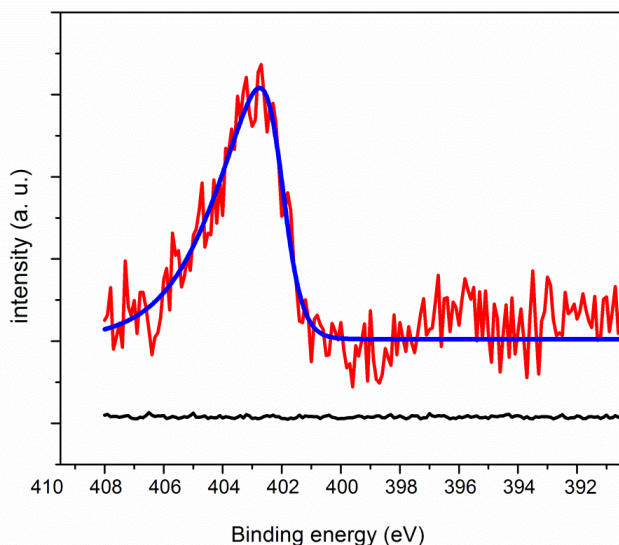

**Figure S1:** XPS spectroscopy of Degussa P25 TiO<sub>2</sub> without adsorption of TEA (black line) and after adsorption of TEA (red line)

### GC and GC-MS:

The quantitative measurements of conversions of substrate and selectivities of products were made on an gas chromatography (Agilent 7890A) equipped with a flame ionization detector (FID) and Agilent Technology 19091J-413 capillary column (30 m $\times$ 0.32 mm $\times$ 0.25  $\mu$ m) using high pure N<sub>2</sub> as the carrier gas. Standard analysis conditions: injector temperature 250 °C, detector temperature 300 °C, column temperature program: 50 °C (hold 1.5 min) raised up to 300 °C (hold 3 min) at a rate of 20 °C/min. Gas chromatography–mass spectrometry analysis was performed on a Shimadzu GC 2010 gas

chromatograph equipped with a Shimadzu GCMS-QP2010 Ultra electron ionization mass spectrometer using a Restek (Rxi®-5Sil MS) capillary column (30 m×0.25 mm×0.25 μm) with high pure He as the carrier gas.

### **DFT calculation:**

The first-principle calculations were performed using the Vienna ab initio simulation package (VASP)<sup>[1]</sup> that based on the density functional theory. The projector augmented wave (PAW)<sup>[2]</sup> method was used to describe the electron–ion interaction and the exchange correlation between electrons was described by the generalized gradient approximation (GGA) in the Perdew–Burke–Ernzerhof (PBE) form. We used a cutoff energy of 500 eV for the plane-wave basis set. Spin polarization was allowed for all systems. The volume of the supercell was fixed but all the internal freedoms were fully relaxed. For the bulk rutile and anatase TiO<sub>2</sub>, the (4×4×6) and (6×6×2) *k*-mesh within the Monkhorst–Pack scheme were used respectively. Lattice relaxation was continued until the forces on all the atoms were converged to less than 10<sup>-2</sup> eV Å<sup>-1</sup>. The lattice constants reproduced from GGA-PBE computations, as well as the theoretical and experimental values from the literatures are listed in Table S1. Our results are in good agreement with both the previous DFT results and experimental results.

Based on our calculated lattice parameters (Table S1), slab models for rutile (110) and anatase (101) surfaces were derived using the fixed-double-layer (FDL) approach<sup>[3]</sup> with the two bottom layers of the slab fixed to their bulk positions (Figure S2, see supporting information for more details). To accommodate the TMA molecule on TiO<sub>2</sub> surface, a (2×1) supercell rutile (110) slab, which contains 4 TiO<sub>2</sub>-layers and 48 atoms, and a (2×2) supercell anatase (101) slab, which contains 4 TiO<sub>2</sub>-layers and 96 atoms, were adopted. The (4×4×1) *k*-mesh generated by the Monkhorst-Pack method was used to optimize the geometry for both slabs. The calculated rutile (110) surface formation energy is 0.51 J/m<sup>2</sup>, which is in excellent agreement with reported result (0.52 J/m<sup>2</sup>)<sup>[4]</sup> and the calculated anatase (101) surface formation energy is 0.52 J/m<sup>2</sup>, which is also consistent with the reported result (0.49 J/m<sup>2</sup>).<sup>[5]</sup>

**Table S1** The calculated lattice parameters (Å) for rutile and anatase TiO<sub>2</sub>, as well as the TMA. Other theoretical and experimental values are also listed.

|           | rutile               |                      | anatase              |                      | TMA                  |                      |
|-----------|----------------------|----------------------|----------------------|----------------------|----------------------|----------------------|
|           | a                    | c                    | a                    | c                    | $d_{N-C}$            | $d_{C-H}$            |
| This work | 4.660                | 2.969                | 3.821                | 9.697                | 1.454                | 1.099                |
| Other DFT | 4.670 <sup>[4]</sup> | 2.971 <sup>[4]</sup> | 3.786 <sup>[5]</sup> | 9.737 <sup>[5]</sup> | 1.457 <sup>[6]</sup> | 1.095 <sup>[6]</sup> |
| Expt.     | 4.587 <sup>[6]</sup> | 2.954 <sup>[6]</sup> | 3.782 <sup>[6]</sup> | 9.502 <sup>[6]</sup> | 1.458                |                      |

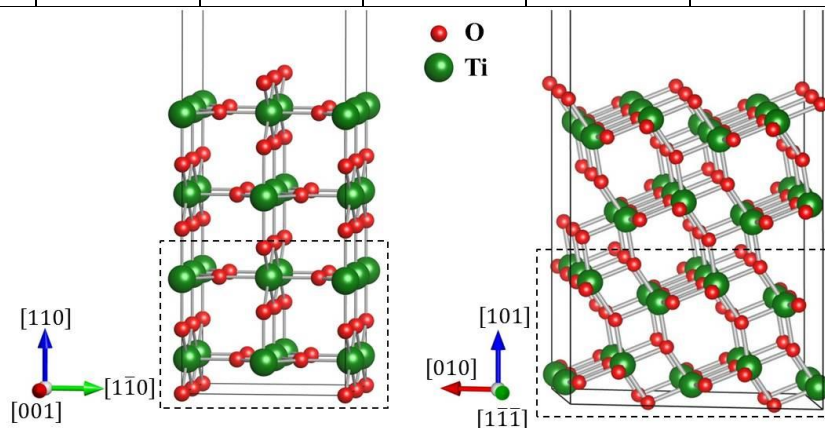

**Figure S2:** The side view and top view of the fixed-double-layer (FDL) model of (2×1) rutile (110) and (2×2) anatase (101) surfaces. The bottom two layers (inside the dotted rectangle zone) were fixed to their bulk positions during geometric optimizations.

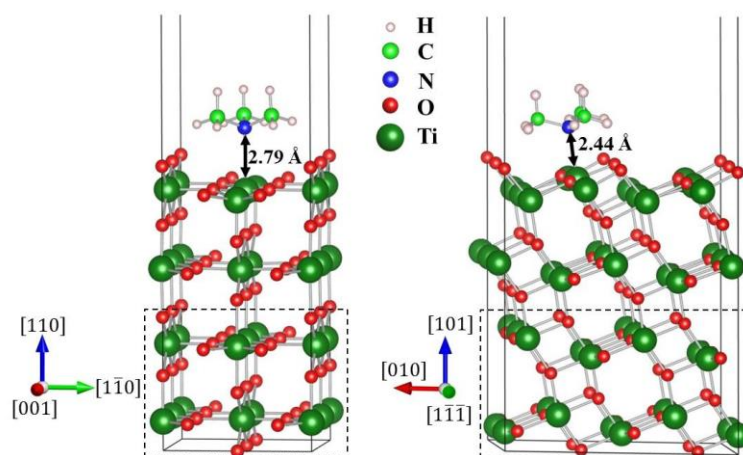

**Figure S3:** The most stable structures with TMA on the surface. The numbers are the distances from N atoms to its nearest Ti atoms.

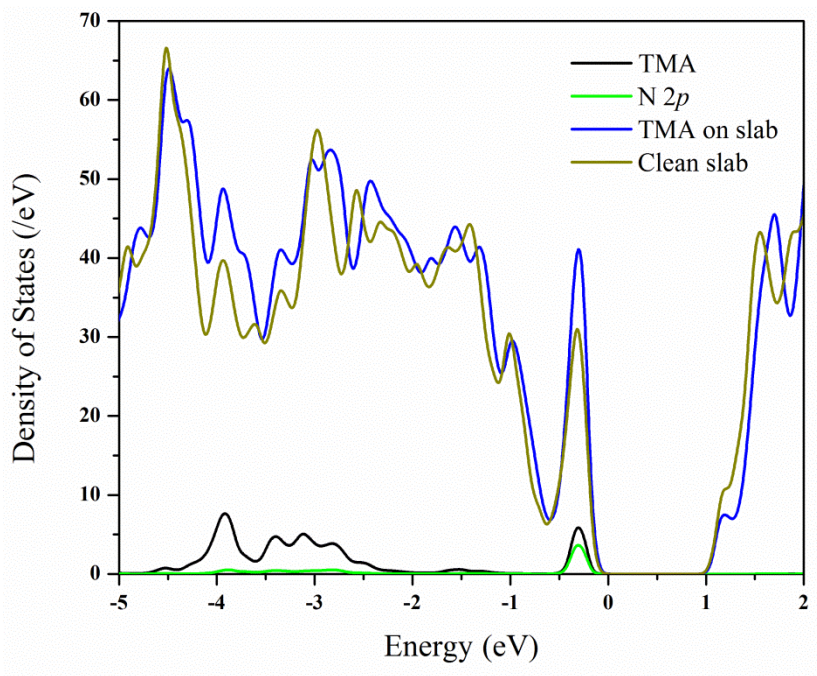

**Figure S4:** DOS of TMA on rutile TiO<sub>2</sub> (110) by PBE.

- [1] G. Kresse, J. Furthmüller, *Phys. Rev. B* **1996**, *54*, 11169-11186.
- [2] J. P. Perdew, K. Burke, M. Ernzerhof, *Phys. Rev. Lett.* **1996**, *77*, 3865-3868.
- [3] K. J. Hameeuw, G. Cantele, D. Ninno, F. Trani, G. Iadonisi, *J. Chem. Phys.* **2006**, *124*, 024708.
- [4] R. Tonner, *ChemPhysChem* **2010**, *11*, 1053-1061.
- [5] M. Lazzeri, A. Vittadini, A. Selloni, *Phys. Rev. B* **2001**, *63*, 155409.
- [6] J. K. Burdett, T. Hughbanks, G. J. Miller, J. W. Richardson, J. V. Smith, *J. Am. Chem. Soc.* **1987**, *109*, 3639-3646.

**Figure S5:** GC-FID results for Table 3. The results were all obtained using a split mode: for entry 1, the split ratio is 1/30; for entries 2-13, the split ratio is 1/20.

Table 4, entry 1

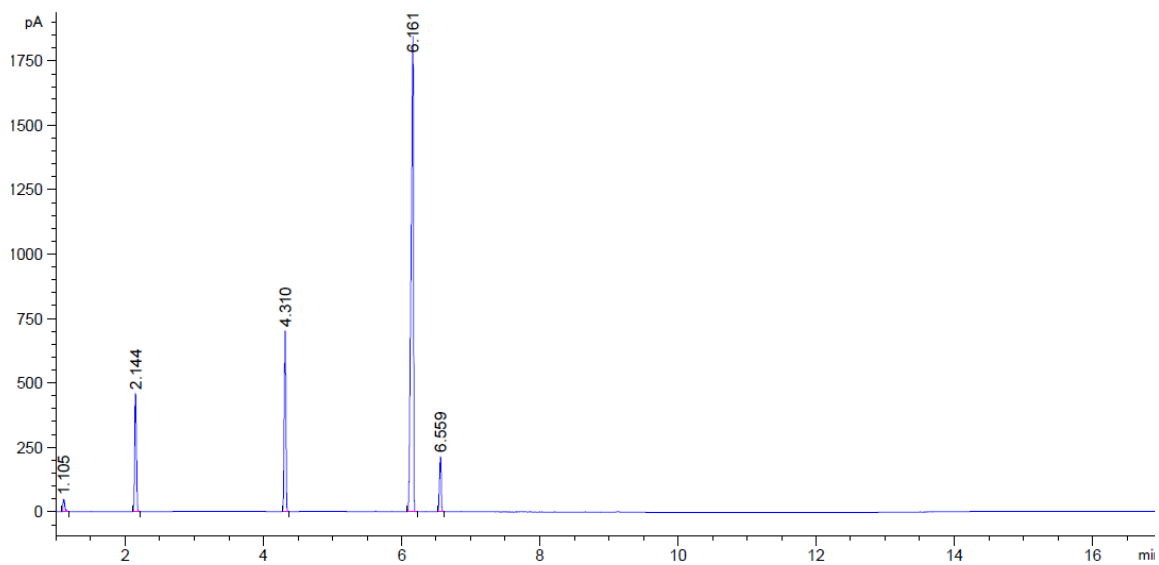

| Retention time (min) | 1.105         | 2.144                                                                               | 4.310                                                                               | 6.161                                                                                 | 6.559                                                                                 |
|----------------------|---------------|-------------------------------------------------------------------------------------|-------------------------------------------------------------------------------------|---------------------------------------------------------------------------------------|---------------------------------------------------------------------------------------|
| Chemical             | $N(C_2H_5)_3$ |  |  |  |  |

Table 4, entry 2

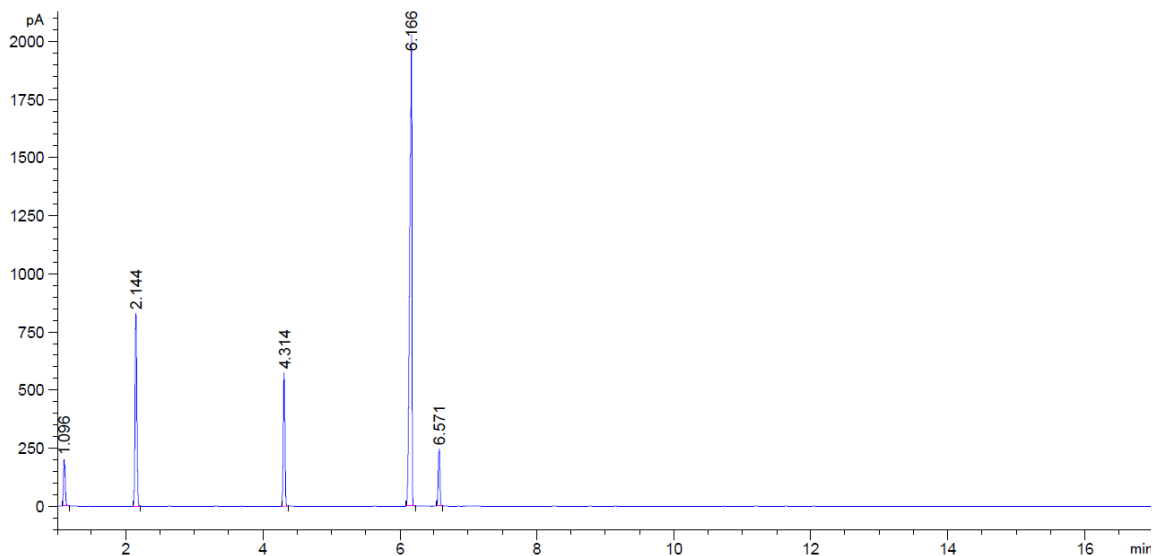

| Retention time (min) | 1.096         | 2.144                     | 4.314                    | 6.166                       | 6.571                           |
|----------------------|---------------|---------------------------|--------------------------|-----------------------------|---------------------------------|
| Chemical             | $N(C_2H_5)_3$ | <chem>c1ccc(Cl)cc1</chem> | <chem>c1ccc(S)cc1</chem> | <chem>Cs(=O)c1ccccc1</chem> | <chem>Cs(=O)(=O)c1ccccc1</chem> |

Table 4, entry 3

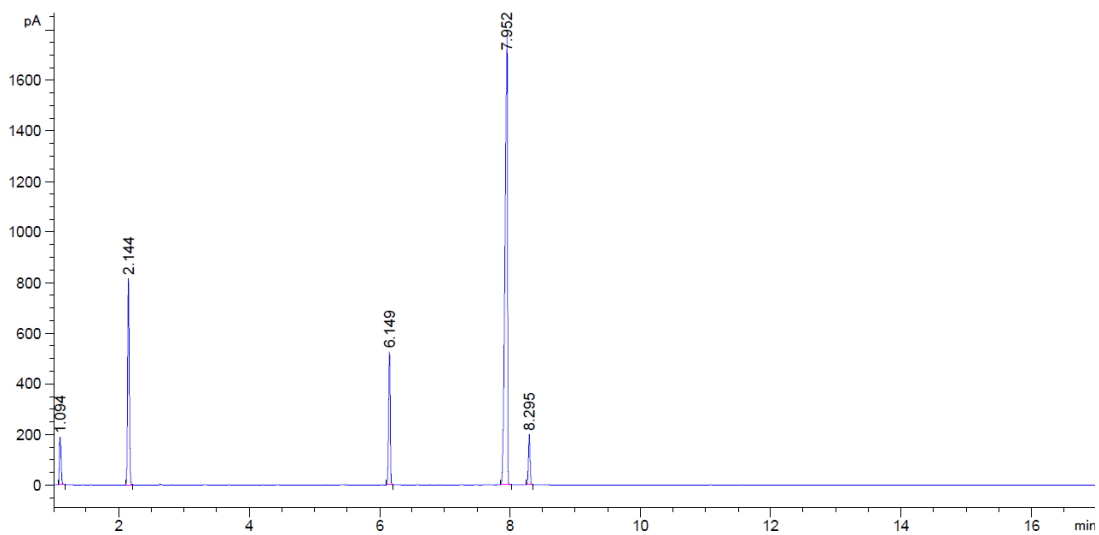

| Retention time (min) | 1.094         | 2.144                     | 6.149                      | 7.952                           | 8.295                               |
|----------------------|---------------|---------------------------|----------------------------|---------------------------------|-------------------------------------|
| Chemical             | $N(C_2H_5)_3$ | <chem>c1ccc(Cl)cc1</chem> | <chem>Cs1ccc(OC)cc1</chem> | <chem>Cs(=O)c1ccc(OC)cc1</chem> | <chem>Cs(=O)(=O)c1ccc(OC)cc1</chem> |



Table 4, entry 4

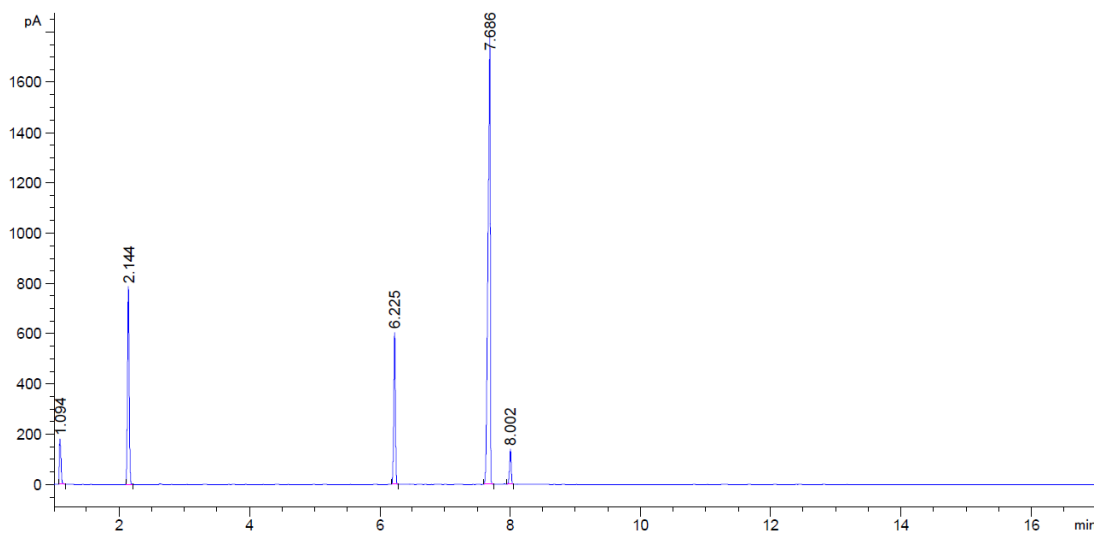

|                      |               |                           |                            |                                     |                                     |
|----------------------|---------------|---------------------------|----------------------------|-------------------------------------|-------------------------------------|
| Retention time (min) | 1.094         | 2.144                     | 6.225                      | 7.686                               | 8.002                               |
| Chemical             | $N(C_2H_5)_3$ | <chem>c1ccc(Cl)cc1</chem> | <chem>COc1ccc(S)cc1</chem> | <chem>COc1ccc(S(=O)(=O)C)cc1</chem> | <chem>COc1ccc(S(=O)(=O)C)cc1</chem> |

Table 4, entry 5

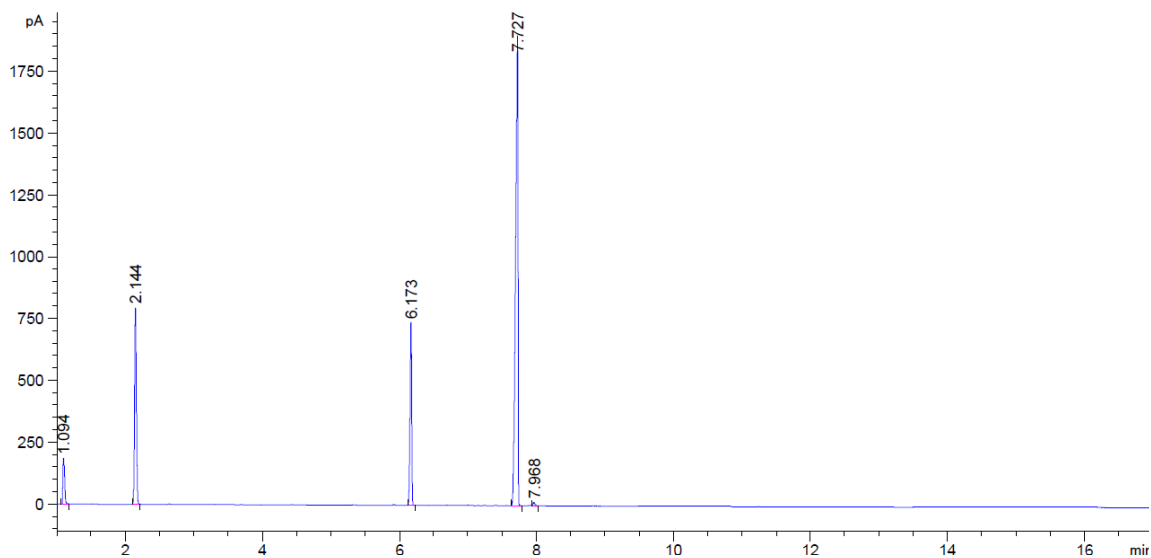

|                      |               |                           |                            |                                     |                                     |
|----------------------|---------------|---------------------------|----------------------------|-------------------------------------|-------------------------------------|
| Retention time (min) | 1.094         | 2.144                     | 6.173                      | 7.727                               | 7.968                               |
| Chemical             | $N(C_2H_5)_3$ | <chem>c1ccc(Cl)cc1</chem> | <chem>COc1ccc(S)cc1</chem> | <chem>COc1ccc(S(=O)(=O)C)cc1</chem> | <chem>COc1ccc(S(=O)(=O)C)cc1</chem> |

Table 4, entry 6

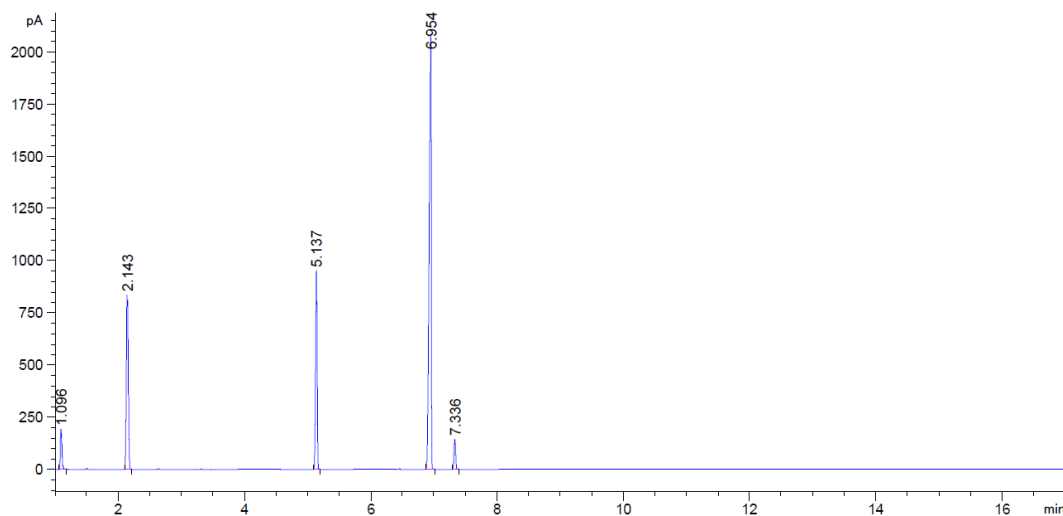

|                      |               |                           |                           |                                    |                                     |
|----------------------|---------------|---------------------------|---------------------------|------------------------------------|-------------------------------------|
| Retention time (min) | 1.096         | 2.143                     | 5.137                     | 6.954                              | 7.336                               |
| Chemical             | $N(C_2H_5)_3$ | <chem>c1ccc(Cl)cc1</chem> | <chem>Cc1ccc(S)cc1</chem> | <chem>Cc1ccc(S(=O)(=O)C)cc1</chem> | <chem>Cc1ccc(S(=O)(=O)OC)cc1</chem> |

Table 4, entry 7

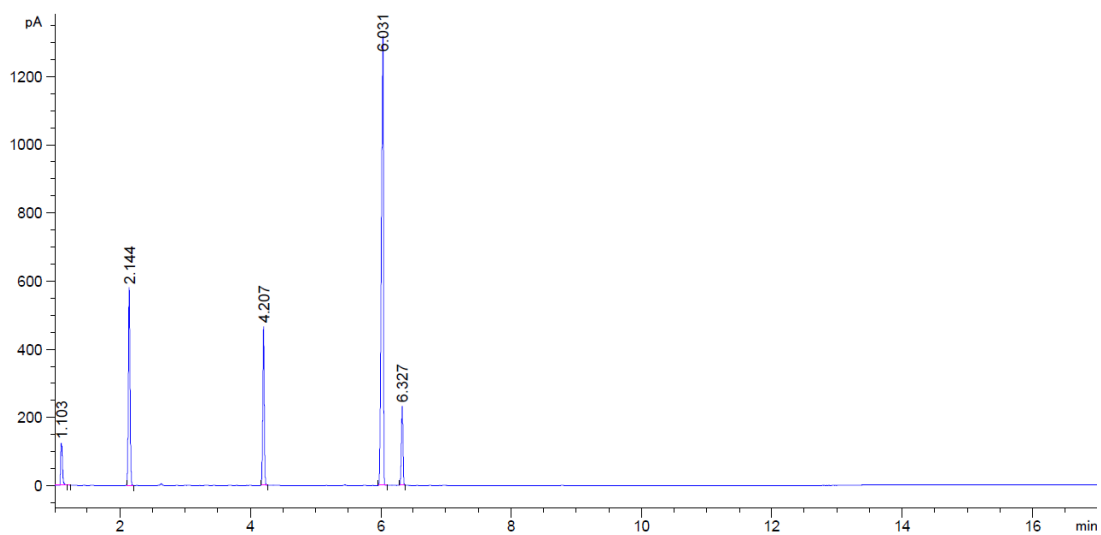

|                      |               |                           |                           |                                    |                                     |
|----------------------|---------------|---------------------------|---------------------------|------------------------------------|-------------------------------------|
| Retention time (min) | 1.103         | 2.144                     | 4.207                     | 6.031                              | 6.327                               |
| Chemical             | $N(C_2H_5)_3$ | <chem>c1ccc(Cl)cc1</chem> | <chem>Fc1ccc(S)cc1</chem> | <chem>Fc1ccc(S(=O)(=O)C)cc1</chem> | <chem>Fc1ccc(S(=O)(=O)OC)cc1</chem> |

Table 4, entry 8

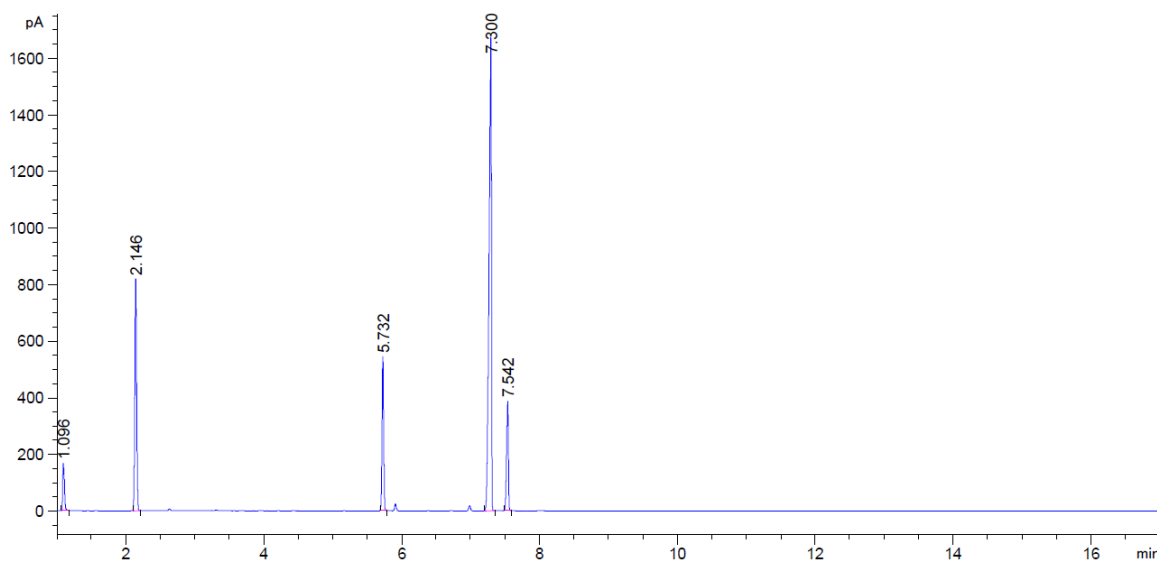

|                      |               |                           |                                |                                    |                                   |
|----------------------|---------------|---------------------------|--------------------------------|------------------------------------|-----------------------------------|
| Retention time (min) | 1.096         | 2.146                     | 5.732                          | 7.300                              | 7.542                             |
| Chemical             | $N(C_2H_5)_3$ | <chem>c1ccc(Cl)cc1</chem> | <chem>CSC1=CC=C(Cl)C=C1</chem> | <chem>C(=O)SC1=CC=C(Cl)C=C1</chem> | <chem>C(=O)SC1=CC=C(F)C=C1</chem> |

Table 4, entry 9

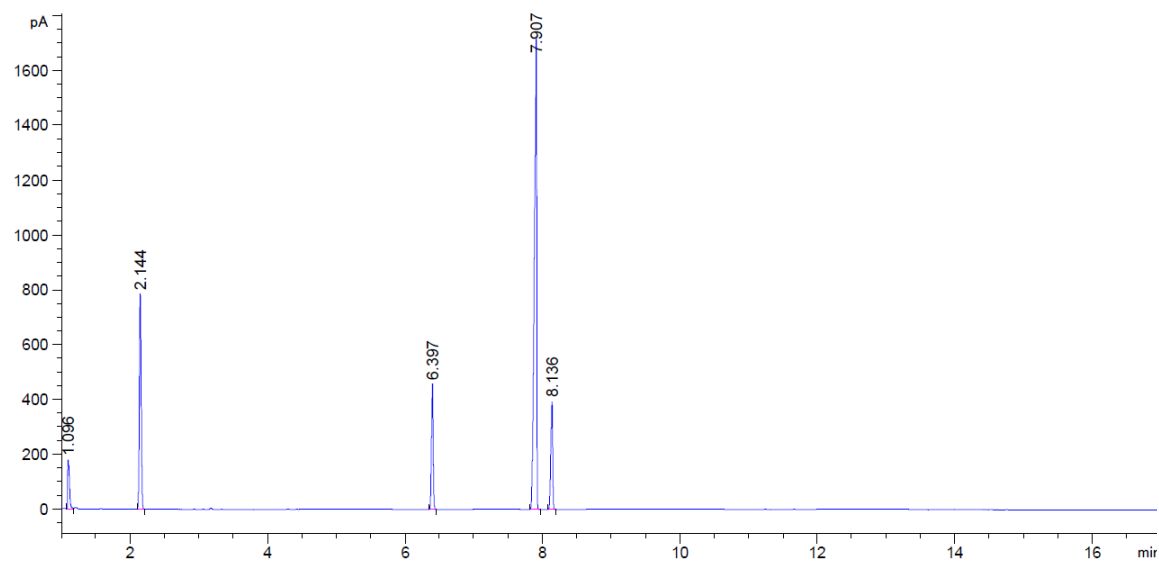

|                      |               |                           |                                |                                    |                                    |
|----------------------|---------------|---------------------------|--------------------------------|------------------------------------|------------------------------------|
| Retention time (min) | 1.096         | 2.144                     | 6.397                          | 7.907                              | 8.136                              |
| Chemical             | $N(C_2H_5)_3$ | <chem>c1ccc(Cl)cc1</chem> | <chem>CSC1=CC=C(Br)C=C1</chem> | <chem>C(=O)SC1=CC=C(Br)C=C1</chem> | <chem>C(=O)SC1=CC=C(Br)C=C1</chem> |

Table 4, entry 10

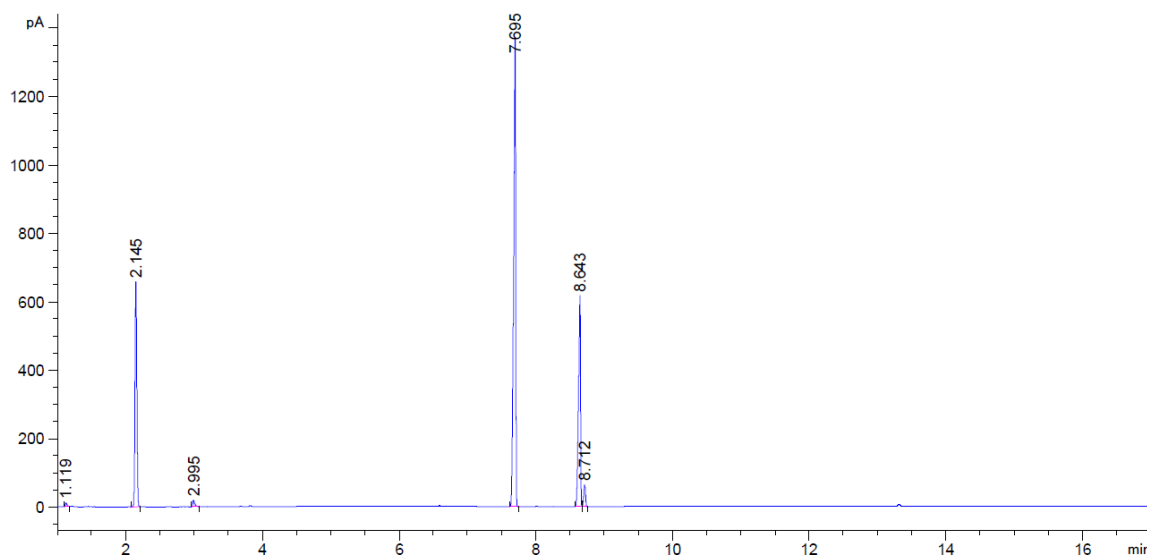

|                      |                       |                           |                                       |                                            |                                                |
|----------------------|-----------------------|---------------------------|---------------------------------------|--------------------------------------------|------------------------------------------------|
| Retention time (min) | 1.119                 | 2.145                     | 7.695                                 | 8.643                                      | 8.712                                          |
| Chemical             | <chem>N(C2H5)3</chem> | <chem>c1ccc(Cl)cc1</chem> | <chem>CSc1ccc([N+](=O)[O-])cc1</chem> | <chem>COS(=O)c1ccc([N+](=O)[O-])cc1</chem> | <chem>COS(=O)(=O)c1ccc([N+](=O)[O-])cc1</chem> |

Table 4, entry 11

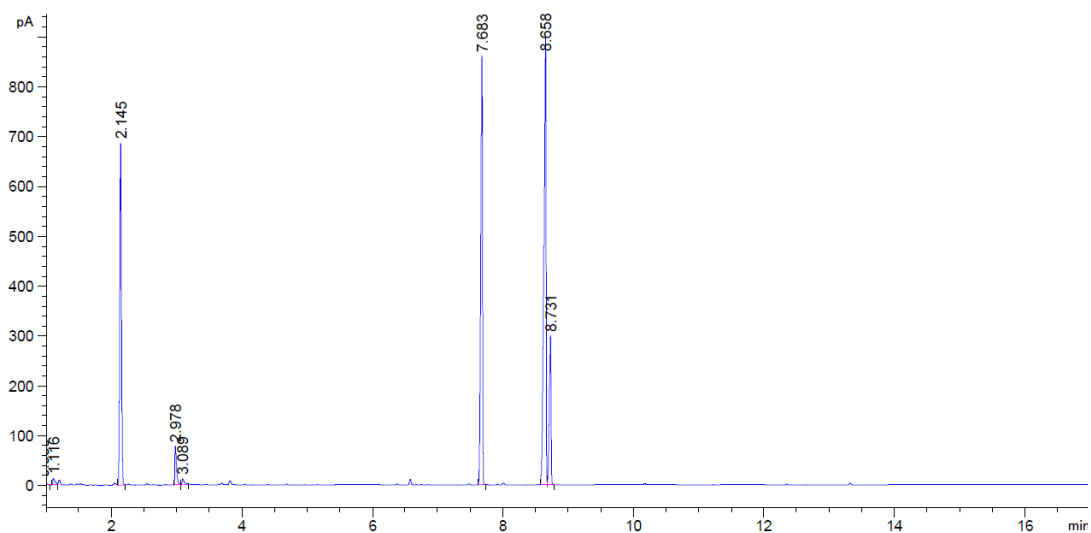

|                      |                       |                           |                                       |                                            |                                                |
|----------------------|-----------------------|---------------------------|---------------------------------------|--------------------------------------------|------------------------------------------------|
| Retention time (min) | 1.116                 | 2.145                     | 7.683                                 | 8.658                                      | 8.731                                          |
| Chemical             | <chem>N(C2H5)3</chem> | <chem>c1ccc(Cl)cc1</chem> | <chem>CSc1ccc([N+](=O)[O-])cc1</chem> | <chem>COS(=O)c1ccc([N+](=O)[O-])cc1</chem> | <chem>COS(=O)(=O)c1ccc([N+](=O)[O-])cc1</chem> |

Table 4, entry 12

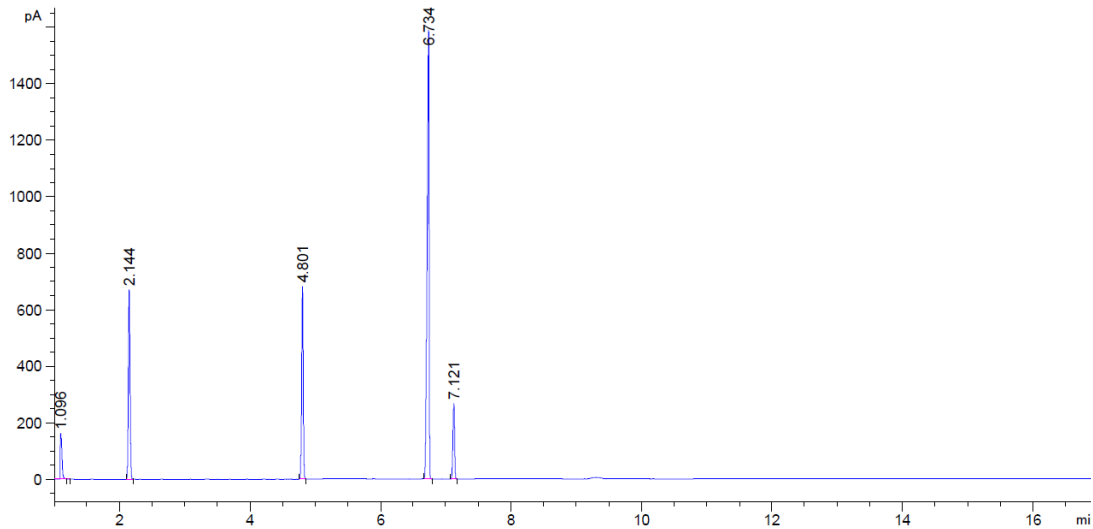

| Retention time (min) | 1.096         | 2.144                     | 4.801                       | 6.734                           | 7.121                                    |
|----------------------|---------------|---------------------------|-----------------------------|---------------------------------|------------------------------------------|
| Chemical             | $N(C_2H_5)_3$ | <chem>c1ccc(Cl)cc1</chem> | <chem>CCSC1=CC=CC=C1</chem> | <chem>CC(=O)SC1=CC=CC=C1</chem> | <chem>CC(=O)OS(=O)(=O)C1=CC=CC=C1</chem> |

Table 4, entry 13

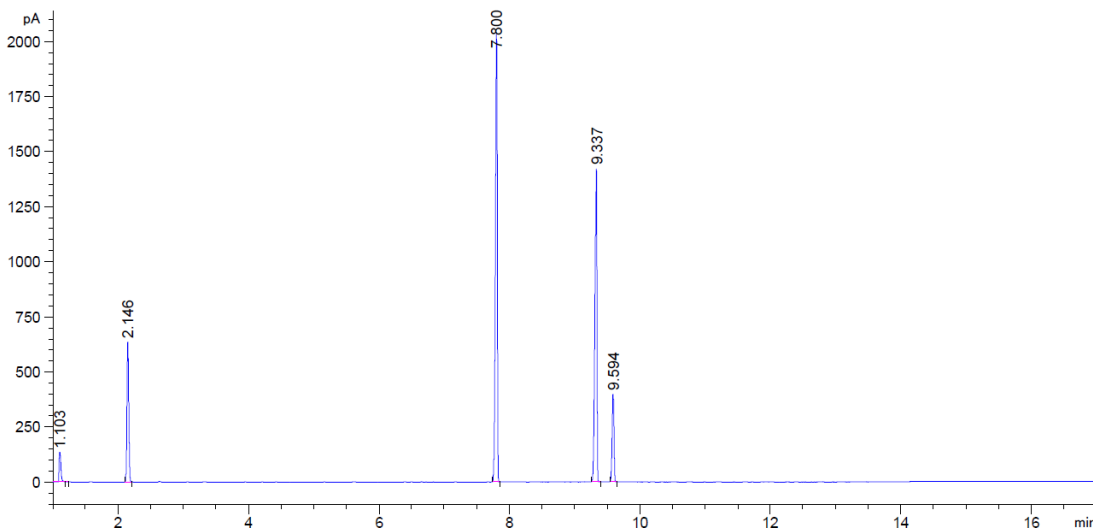

| Retention time (min) | 1.103         | 2.146                     | 7.800                              | 9.337                                  | 9.594                                        |
|----------------------|---------------|---------------------------|------------------------------------|----------------------------------------|----------------------------------------------|
| Chemical             | $N(C_2H_5)_3$ | <chem>c1ccc(Cl)cc1</chem> | <chem>c1ccc(cc1)S2=CC=CC=C2</chem> | <chem>O=S(=O)(c1ccccc1)c2ccccc2</chem> | <chem>O=S(=O)(c1ccccc1)c2ccccc2C(=O)O</chem> |
